# Supplementary material
Source: HighWire-hosted journal article supplement (https://diabetes.diabetesjournals.org/content/suppl/2004/09/28/53.10.2623)
Supplement: db0459OnlineAppendix.pdf [file db0459OnlineAppendix.pdf]

**ON LINE APPENDIX TABLE. Multivariate logistic regression analysis of liver injury markers and CRP with risk of incident diabetes in non-diabetic IRAS subjects, with full adjustment for covariates.**

| Independent | Unit         | OR <sup>1</sup> | 95% CI    |
|-------------|--------------|-----------------|-----------|
| AST         | SD           | 1.29*           | 1.05-1.57 |
| CRP         | SD           | 1.15            | 0.90-1.47 |
| AST         | Q4 vs. Q1-Q3 | 1.98†           | 1.23-3.17 |
| CRP         | > 3.0 mg/L   | 1.22            | 0.76-1.97 |
| ALT         | SD           | 1.23            | 0.98-1.55 |
| CRP         | SD           | 1.15            | 0.90-1.47 |
| ALT         | Q4 vs. Q1-Q3 | 2.04†           | 1.24-3.35 |
| CRP         | > 3.0 mg/L   | 1.27            | 0.79-2.05 |

<sup>1</sup>Model adjusted for age, gender, ethnicity, clinical center, alcohol category, smoking, waist circumference, triglyceride, HDL, impaired glucose tolerance, S<sub>1</sub>, and AIR

ORs in rows indicated by SD refer to risk of incident type 2 diabetes associated with a 1 standard deviation difference in the natural log of the independent variable; ORs in rows indicated by Q4 vs. Q1-Q3 refer to risk of incident type 2 diabetes among those in the 4<sup>th</sup> quartile of the independent variable of interest compared to those in the lower 3 quartiles.

\*p<0.05; †p<0.01;

CI, confidence interval
